# Supplementary material
Source: Springer Nature journal article supplement (https://www.springermedizin.de/resource/supplementary/12885_2010_2366_MOESM2_ESM.pdf/9461114)

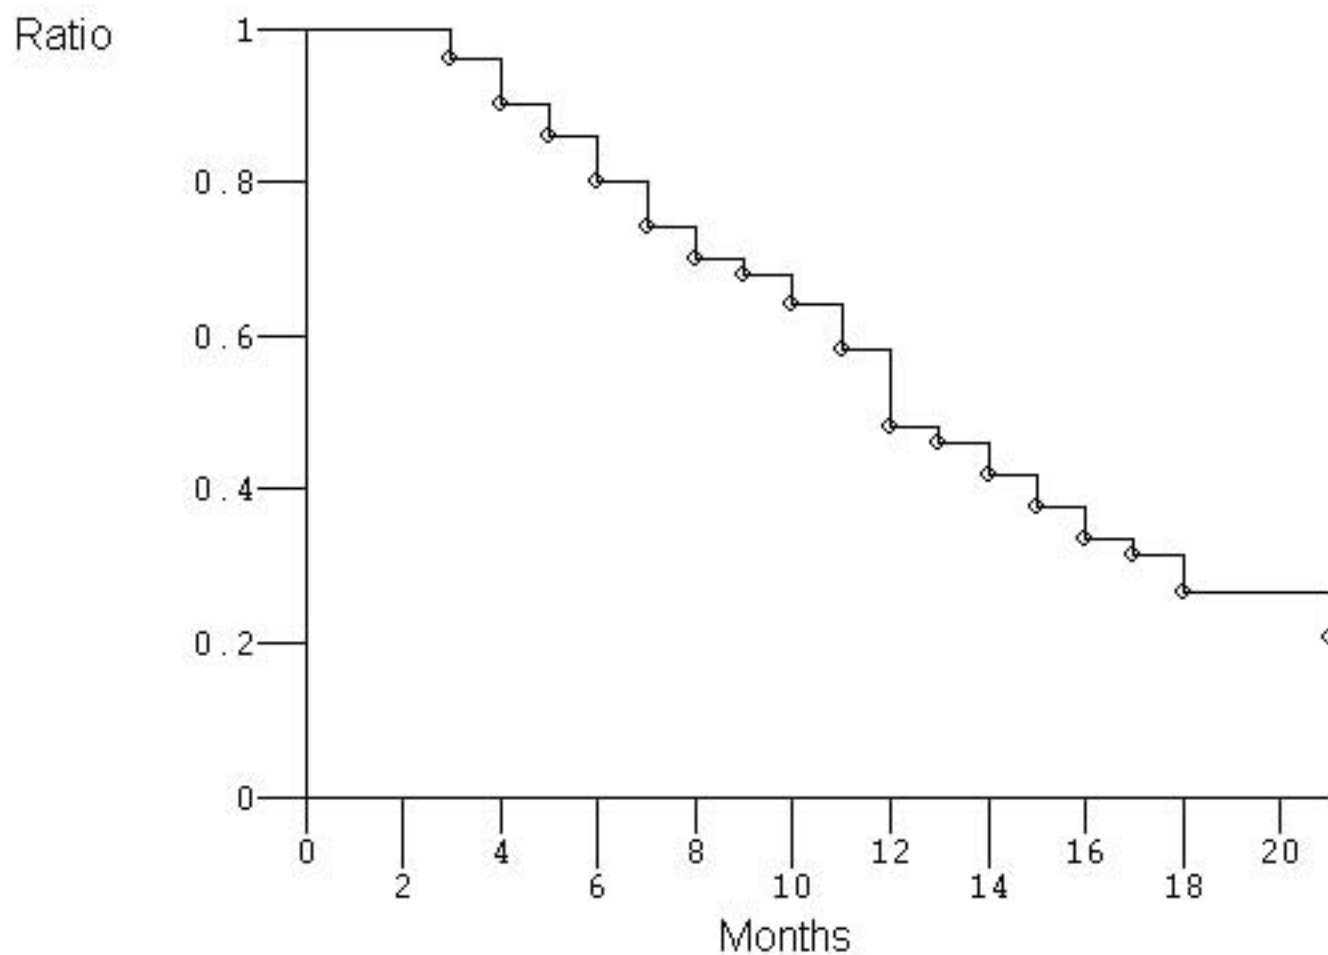

(A) Median PFS 12 months (3-46+)

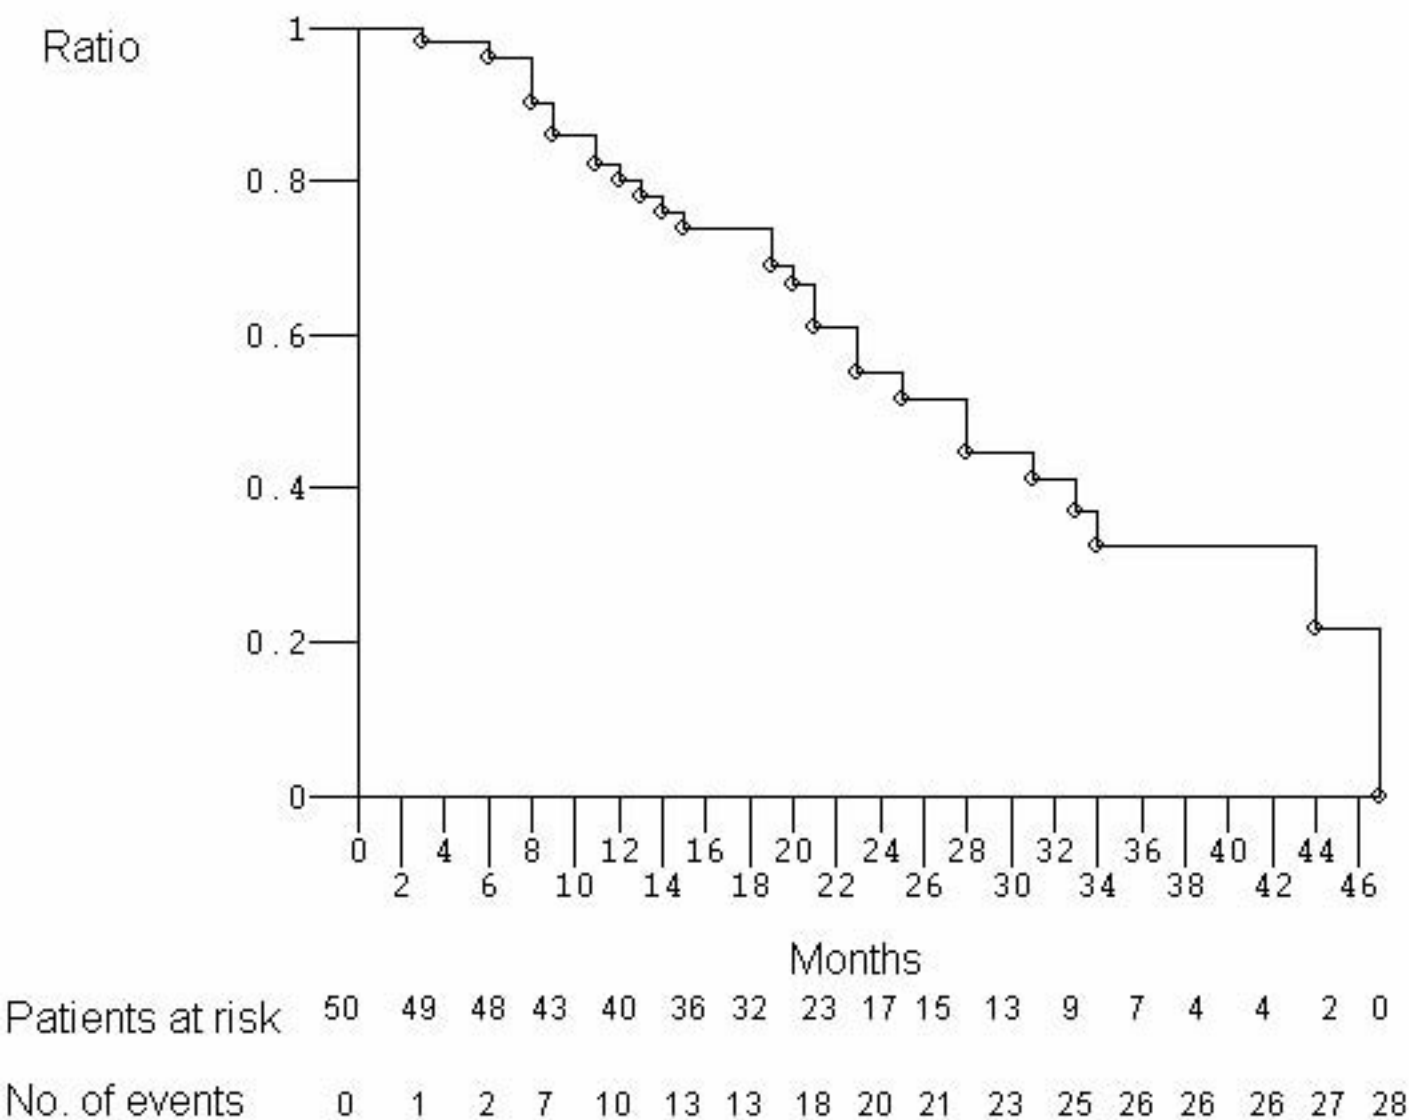

(B) Median OS 28 months (3-47)

Supplement: MOESM2 [file 9461114]
